# Supplementary material for: Layered nanostructured ferroelectric perovskite Bi5FeTi3O15 for visible light photodegradation of antibiotics
Source: Royal Society of Chemistry journal article supplement (doi:10.1039/c7ta06618j), 2017-01-01
Supplement: c7ta06618j1.pdf [file c7ta06618j1.pdf]

SUPPORTING INFORMATION

**Layered Nanostructured Ferroelectric Perovskite  $\text{Bi}_5\text{FeTi}_3\text{O}_{15}$  for Visible-Light  
Photodegradation of Antibiotics**

Reshalaiti Hailili,<sup>a,b</sup> Zhi-Qiang Wang,<sup>c</sup> Meiyue Xu,<sup>d</sup> Yuanhao Wang,<sup>a</sup> Xue-Qing Gong,<sup>\*c</sup> Tao Xu,<sup>\*d</sup>  
and Chuanyi Wang<sup>\*a</sup>

<sup>a</sup>Laboratory of Environmental Sciences and Technology, Xinjiang Technical Institute of Physics & Chemistry, Key Laboratory of Functional Materials and Devices for Special Environments, Chinese Academy of Sciences, Urumqi 830011, China

<sup>b</sup>The Graduate School of Chinese Academy of Science, Beijing 100049, China

<sup>c</sup>Research Institute of Industrial Catalysis, East China University of Science and Technology, Shanghai 200237, China.

<sup>d</sup>Department of Chemistry and Biochemistry, Northern Illinois University, DeKalb Illinois 60115, United States

To whom correspondence should be addressed: E-mail: [cywang@ms.xjb.ac.cn](mailto:cywang@ms.xjb.ac.cn); [xgong@ecust.edu.cn](mailto:xgong@ecust.edu.cn); [txu@niu.edu](mailto:txu@niu.edu)

## CONTENTS

|                                                                                                                                                                                                             |     |
|-------------------------------------------------------------------------------------------------------------------------------------------------------------------------------------------------------------|-----|
| <b>Experimental Section</b> .....                                                                                                                                                                           | P3  |
| <b>Figure S1.</b> Simulated and experimental XRD patterns of $\text{Bi}_5\text{FeTi}_3\text{O}_{15}$ .....                                                                                                  | P4  |
| <b>Figure S2.</b> EDS elemental mapping of <i>sample 1</i> .....                                                                                                                                            | P5  |
| <b>Figure S3.</b> EDS elemental mapping of <i>sample 6</i> .....                                                                                                                                            | P6  |
| <b>Figure S4.</b> Surface atomic arrangements of $\text{Bi}_5\text{FeTi}_3\text{O}_{15}$ crystal.....                                                                                                       | P7  |
| <b>Table S1.</b> Comparison of different visible light active Fe-based photocatalysts for tetracycline removal.....                                                                                         | P8  |
| <b>Figure S5.</b> Six run successive photodegradations of tetracycline with <i>samples 1–3</i> under visible light irradiation.....                                                                         | P9  |
| <b>Figure S6.</b> High-Performance Liquid Chromatography–Mass Spectrometry analysis for all intermediates generated in tetracycline degradation in the presence of <i>sample 6</i> under visible-light..... | P10 |
| <b>Figure S7.</b> The selected different layers of $\text{Bi}_5\text{FeTi}_3\text{O}_{15}$ for calculation.....                                                                                             | P11 |
| <b>Table S2.</b> The calculated DOS values of different layers. ....                                                                                                                                        | P12 |
| <b>Figure S8.</b> Trapping test, Hydroxyl radical ( $\cdot\text{OH}$ ) detection and ESR detection of active species using spin-trapping agents over <i>sample 1</i> .....                                  | P13 |
| <b>Figure S9.</b> Trapping test, Hydroxyl radical ( $\cdot\text{OH}$ ) detection and ESR detection of active species using spin-trapping agents over <i>sample 2</i> .....                                  | P14 |
| <b>Figure S10.</b> Trapping test, Hydroxyl radical ( $\cdot\text{OH}$ ) detection and ESR detection of active species using spin-trapping agents over <i>sample 3</i> .....                                 | P15 |
| <b>Figure S11.</b> Structure of tetracycline.....                                                                                                                                                           | P16 |
| <b>Figure S12.</b> Initial pH influences to tetracycline degradation in the presence of <i>sample 6</i> .....                                                                                               | P17 |

**References.....P18**

## Experimental Section

**Synthesis of Bi<sub>5</sub>FeTi<sub>3</sub>O<sub>15</sub> Photocatalysts.** All of the chemicals were analytically pure and used as received from commercial sources without further purification. Bi<sub>5</sub>FeTi<sub>3</sub>O<sub>15</sub> photocatalysts were synthesized through a hydrothermal process. In the typical synthesis, the 3.0 mmol of Ti(OC<sub>4</sub>H<sub>9</sub>)<sub>4</sub>, 5.0 mmol Bi(NO<sub>3</sub>)<sub>3</sub>·5H<sub>2</sub>O, 1.0 mmol of Fe(NO<sub>3</sub>)<sub>3</sub>·9H<sub>2</sub>O and 30.0 mL water containing 5.0 mL HNO<sub>3</sub> was added to a vial containing in a Teflon-lined steel bomb. Upon the addition of water, the solution became white and opaque, indicating hydrolysis of Bi(NO<sub>3</sub>)<sub>3</sub>·5H<sub>2</sub>O, under vigorous stirring a concentrated aqueous solution of NaOH was added dropwise into the above solution until a yellow suspension was formed. After being stirred 40 min, the pH was moderated to 7.0–14.0 by using HCl or NaOH. To ensure full dispersion, the colloidal suspension was stirred for 5 h and transferred into a 50 mL Teflon-lined stainless steel. The autoclave was heated at 160 °C for 15 h at autogenous pressure, and the autoclave was cooled at a rate of 5 °C/min to 100 °C and then, further cooled to room-temperature at a rate of 3 °C/min. The obtained *samples* were separated by filtration, washed with deionized water and absolute alcohol several times, then dried at 60 °C overnight and collected for further characterizations.

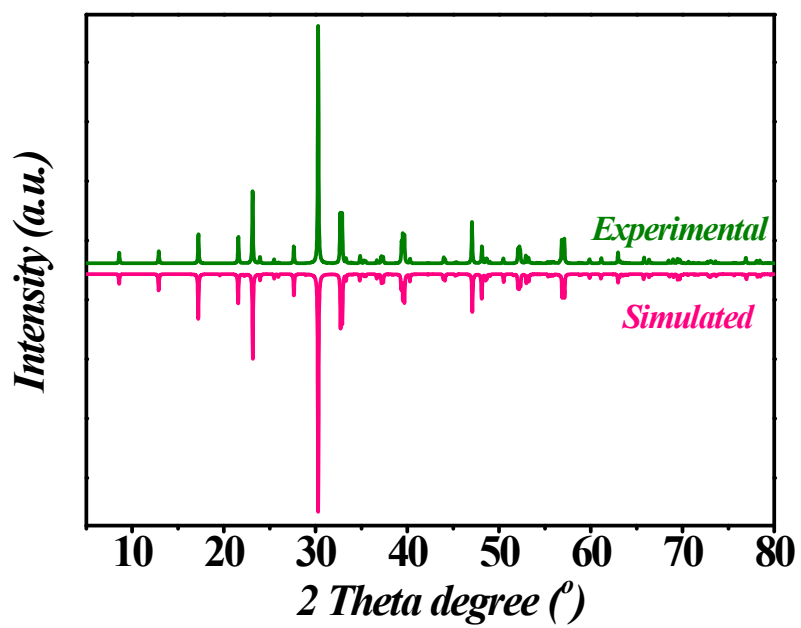

**Figure S1.** Simulated and experimental XRD patterns of Bi<sub>5</sub>FeTi<sub>3</sub>O<sub>15</sub> photocatalysts.

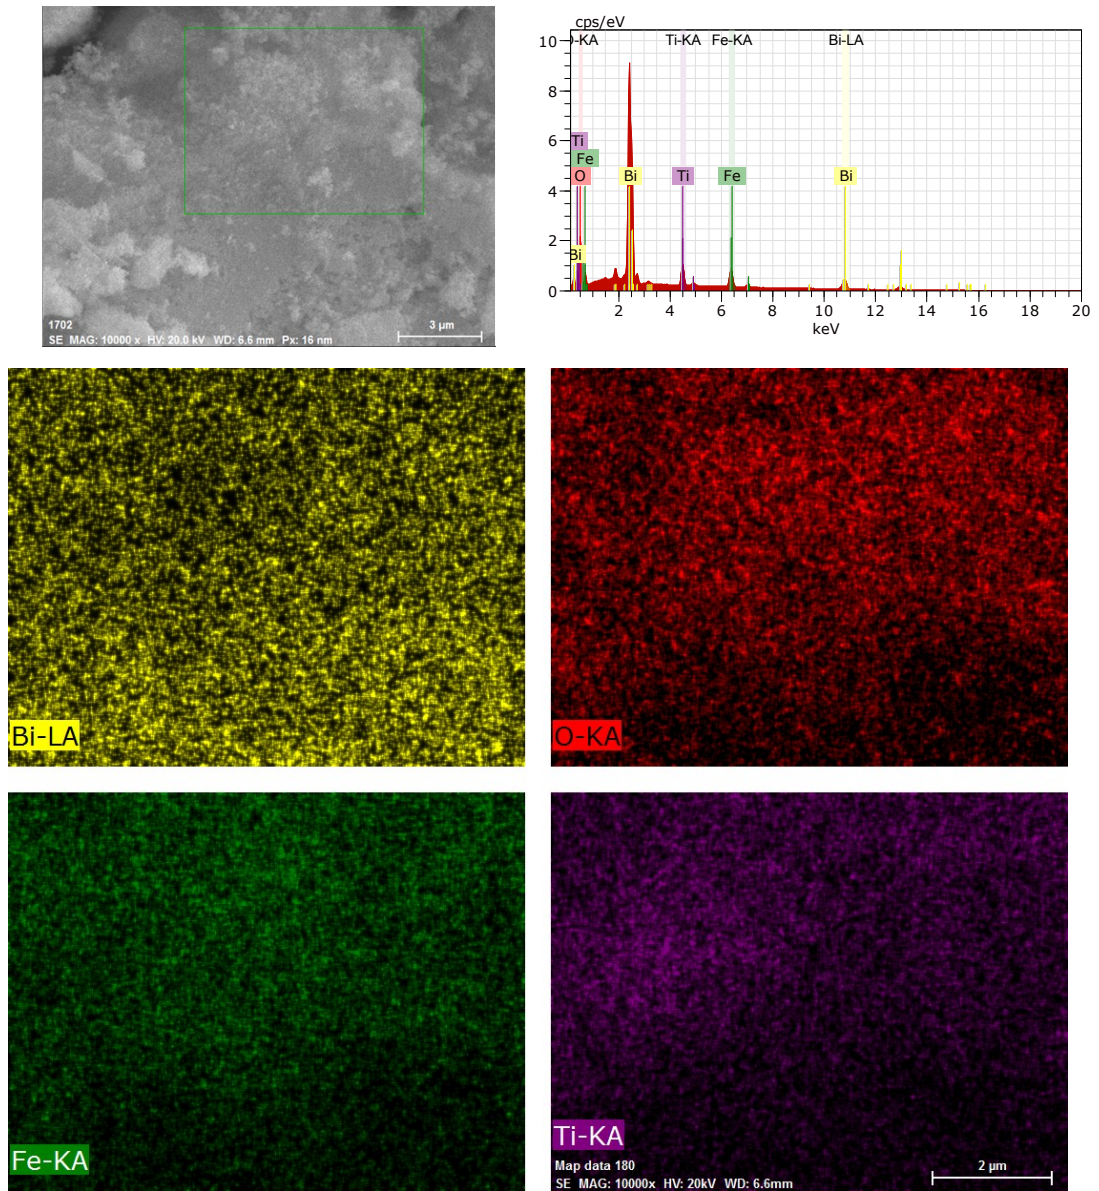

**Figure S2.** EDS elemental mapping of Bi, Ti, Fe and O in *sample 1*

The *sample 1* was consists of only from Bi, Fe, Ti and O, and all the elements are uniformly distributed on the surface of *sample 1*.

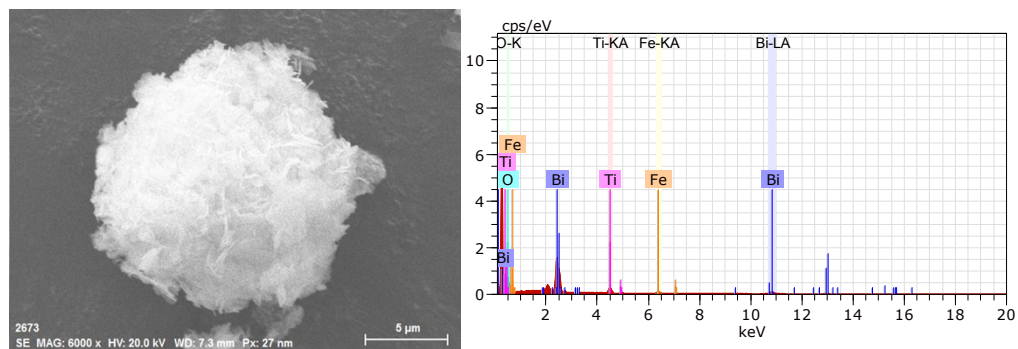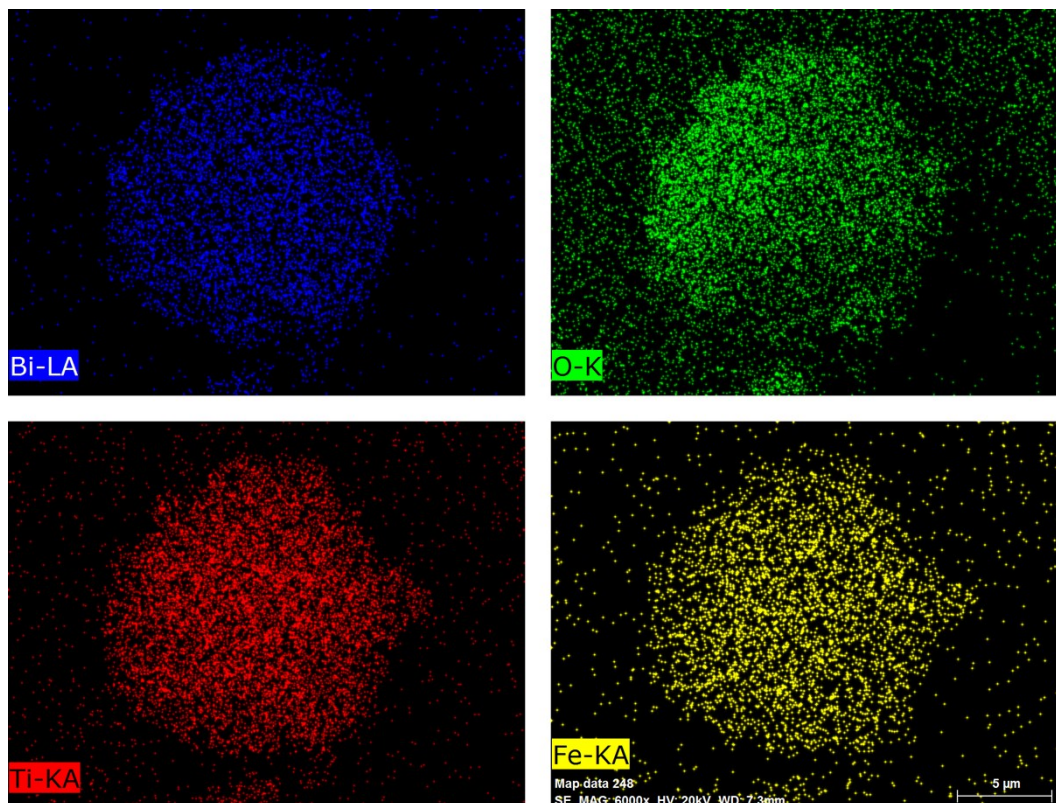

**Figure S3.** EDS elemental mapping of Bi, Ti, Fe and O in *sample 6*

The *sample 6* displays flower-like morphology and consists of Bi, Fe, Ti and O, and all the elements are uniformly distributed on the surface of *sample 6*.

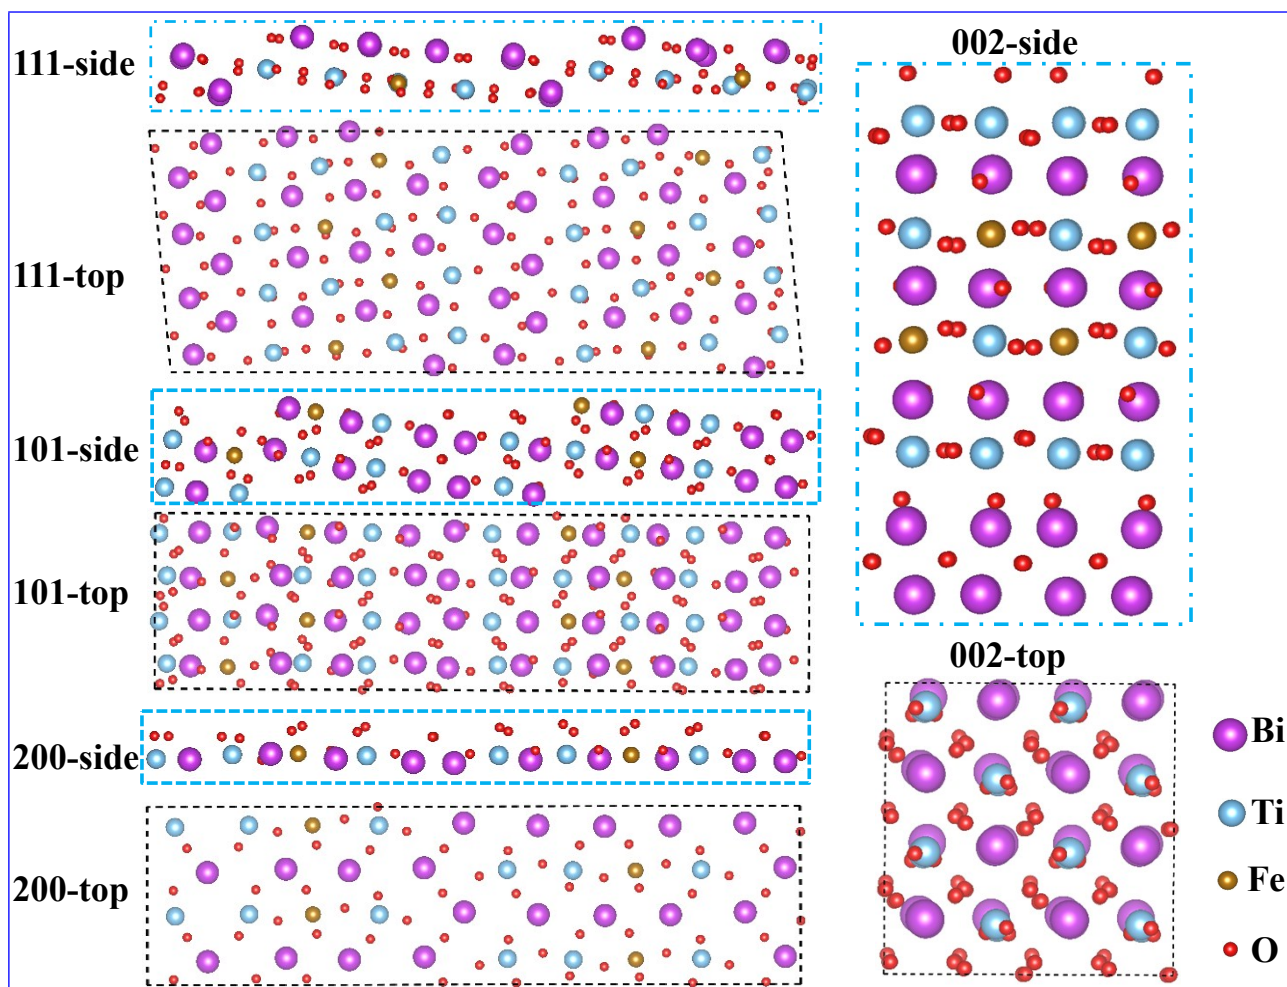

**Figure S4.** Surface atomic arrangements of  $\text{Bi}_5\text{FeTi}_3\text{O}_{15}$  crystal.



**Table S1.** Comparison of different visible light active Fe-based photocatalysts for tetracycline removal.

| Photocatalyst                                                        | Optimum conditions      | Tetracycline removal at optimum condition (%) | Tetracycline removal at 60 min (%) | Ref.      |
|----------------------------------------------------------------------|-------------------------|-----------------------------------------------|------------------------------------|-----------|
| MgFe <sub>2</sub> O <sub>4</sub>                                     | 0.1 g, 100 mL, 120 min  | 64.43                                         | 44                                 | 1         |
| NiFe <sub>2</sub> O <sub>4</sub> /Bi <sub>2</sub> O <sub>3</sub>     | 0.1 g, 100 mL, 90 min   | 90.78                                         | 85                                 | 2         |
| NiFe <sub>2</sub> O <sub>4</sub>                                     | 0.1 g, 100 mL, 90 min   | 47.43                                         | 33                                 | 2         |
| Fe <sub>2</sub> O <sub>3</sub> /MgFe <sub>2</sub> O <sub>4</sub>     | 0.01 g, 100 mL, 120min  | 48.75                                         | 26                                 | 3         |
| Ag/Fe <sub>3</sub> O <sub>4</sub> /g-C <sub>3</sub> N <sub>4</sub>   | 0.05 g, 100 mL, 90 min  | 88.52                                         | 62                                 | 4         |
| Fe <sub>3</sub> O <sub>4</sub> /g-C <sub>3</sub> N <sub>4</sub>      | 0.08 g, 100 mL, 120 min | 79.00                                         | 45                                 | 5         |
| CoFe <sub>2</sub> O <sub>4</sub> /Ag/Ag <sub>3</sub> VO <sub>4</sub> | 0.05 g, 100 mL, 8 min   | 61.48                                         | NG                                 | 6         |
| Fe-SrTiO <sub>3</sub>                                                | 0.1 g, 100 mL, 80 min   | 71.61                                         | 68                                 | 7         |
| Ni <sub>(1-x)</sub> Cu <sub>(x)</sub> Fe <sub>2</sub> O <sub>4</sub> | 0.1 g, 100 mL, 360 min  | 78.17                                         | 12                                 | 8         |
| NiFe <sub>2</sub> O <sub>4</sub>                                     | 0.1 g, 100 mL, 360 min  | 32.00                                         | 6                                  | 8         |
| SrTiO <sub>3</sub> /Fe <sub>2</sub> O <sub>3</sub>                   | 0.1 g, 100 mL, 140 min  | 82.70                                         | 60                                 | 9         |
| Fe <sub>2</sub> O <sub>3</sub>                                       | 0.1 g, 100 mL, 140 min  | 33.31                                         | 6                                  | 9         |
| Ag/AgCl/(x)Fe(0)                                                     | 0.01 g, 100 mL, 240 min | 98.51                                         | 36                                 | 10        |
| Bi <sub>5</sub> FeTi <sub>3</sub> O <sub>15</sub>                    | 0.04 g, 100 mL, 60 min  | 99.34                                         | 96.5 at 20 min                     | This work |

\*NG = Not given

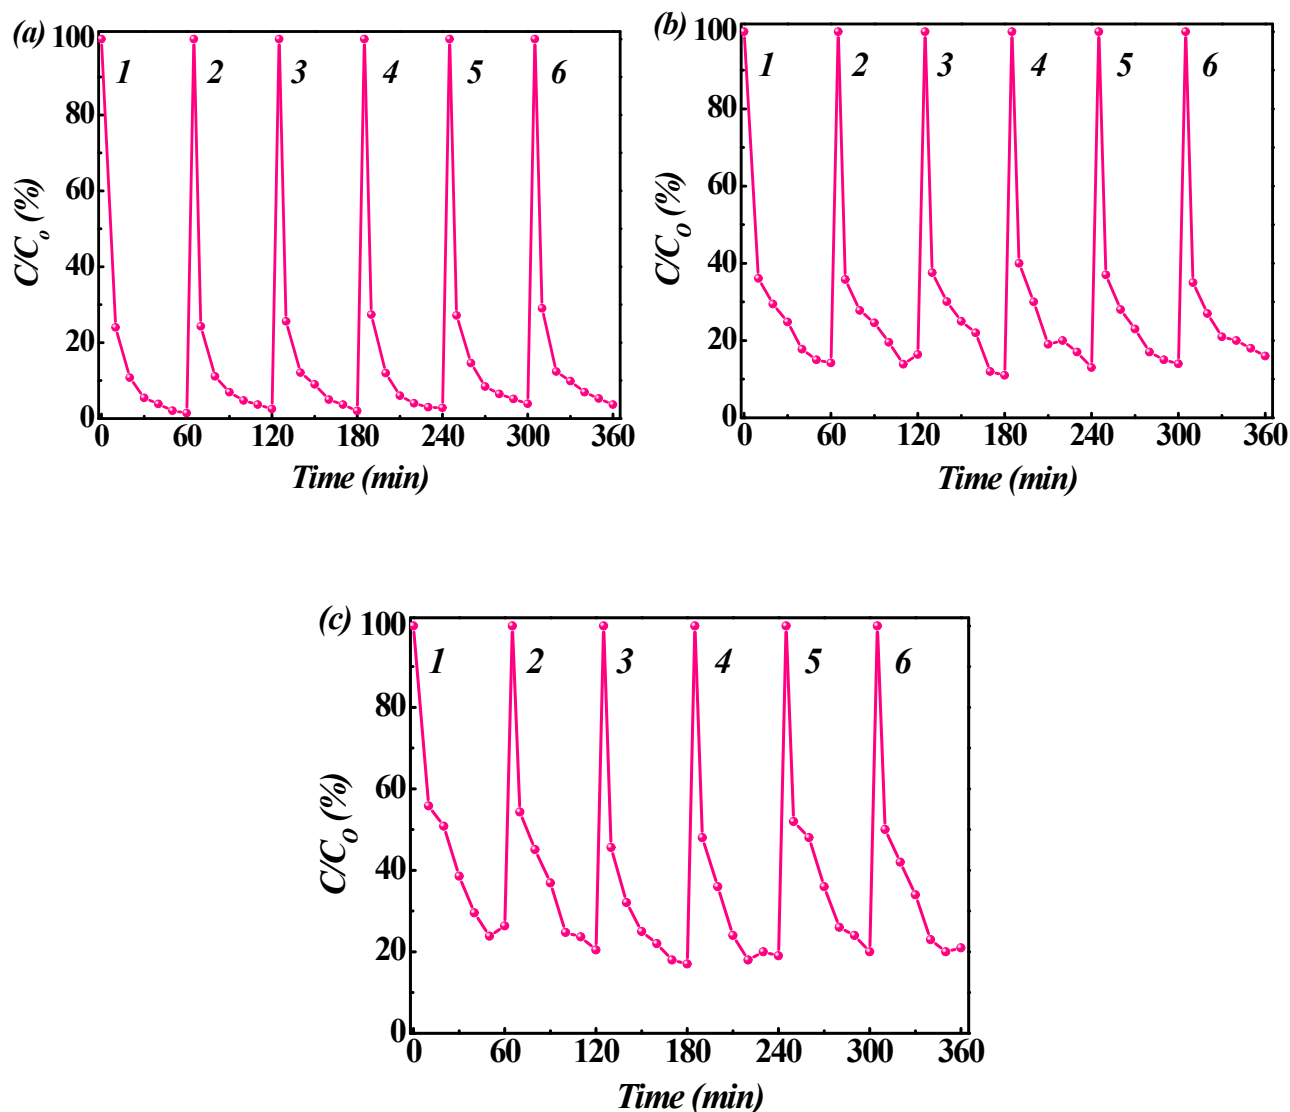

**Figure S5.** (a ~ c) Six run successive photodecomposition of tetracycline with *sample 1*, *sample 2* and *sample 3* under visible light irradiation.

Figure S5 presents the tests of degradation percentage as a function of irradiation time in the presence of *sample 1–3* over six cycles for tetracycline concentration changes detected at the maximum absorbance of 355 nm. It can be seen from stability test that as-obtained *samples* are still displayed high efficiency and stability even after six cycles photocatalytic degradation (360 min) under visible light irradiation.

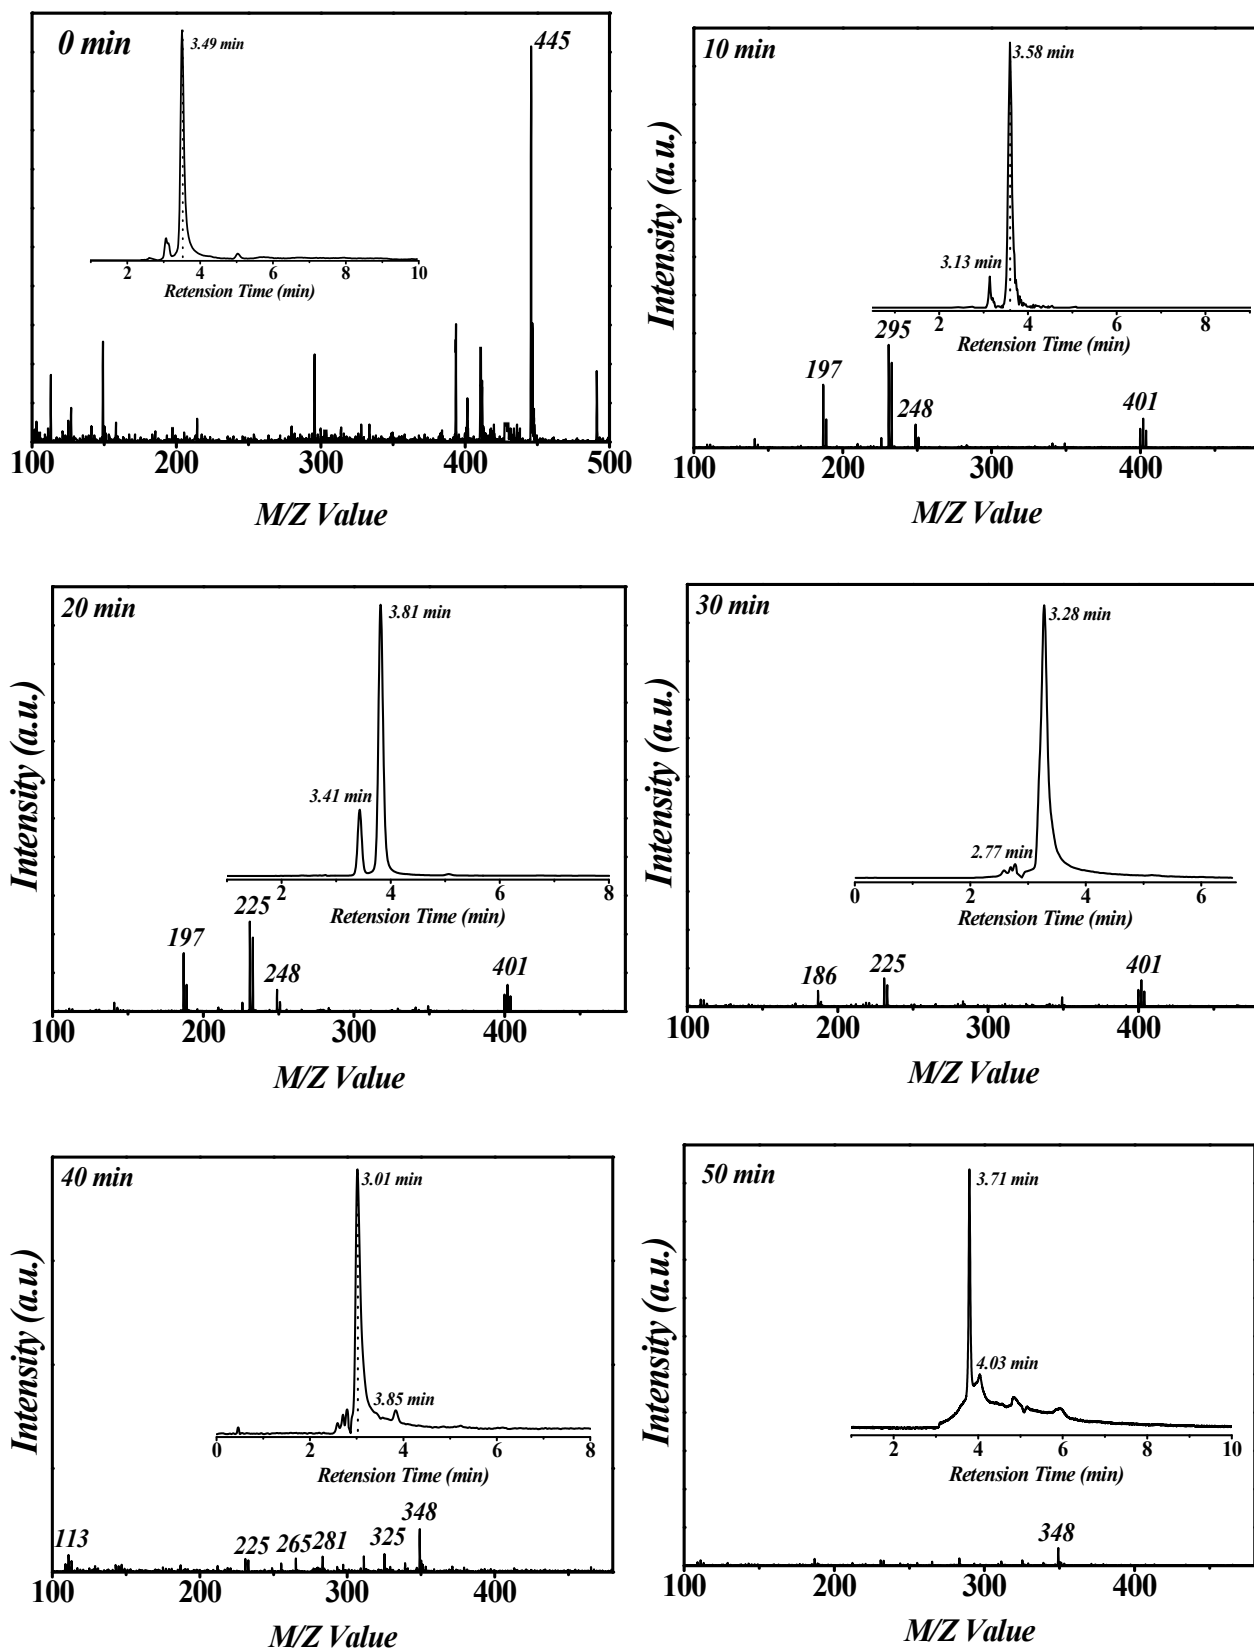

**Figure S6.** High-Performance Liquid Chromatography–Mass Spectrometry (LC-MS) analysis for all intermediates generated in tetracycline degradation in the presence of *sample 6* under visible-light.

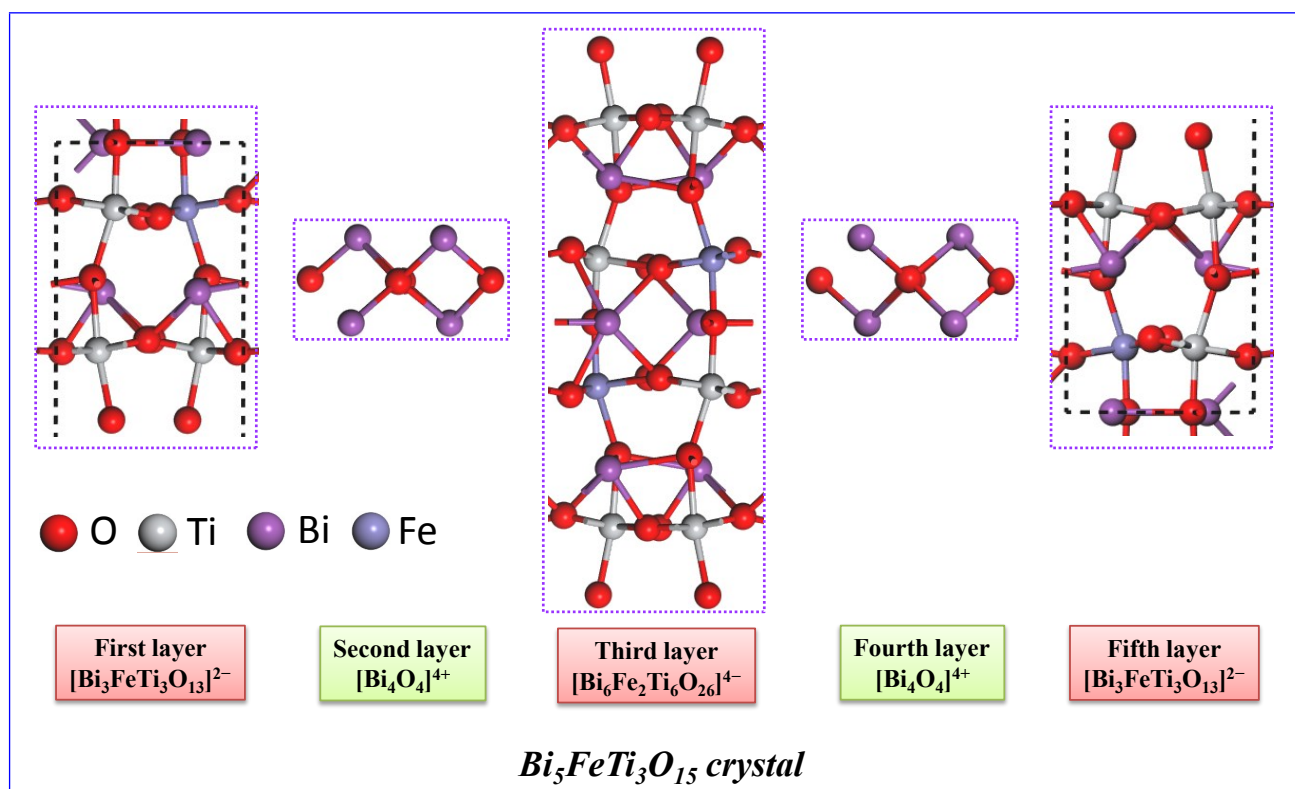

**Figure S7.** The selected different layers of  $\text{Bi}_5\text{FeTi}_3\text{O}_{15}$  for calculation.

**Table S2.** The calculated DOS values within the 1.0 eV window above the CB minimum of different layers.

| Layer    | 1     | 2     | 3      | 4     | 5     |
|----------|-------|-------|--------|-------|-------|
| Integral | 6.211 | 0.738 | 14.413 | 0.620 | 6.211 |
| DOS (%)  | 22.03 | 2.62  | 51.12  | 2.20  | 22.03 |

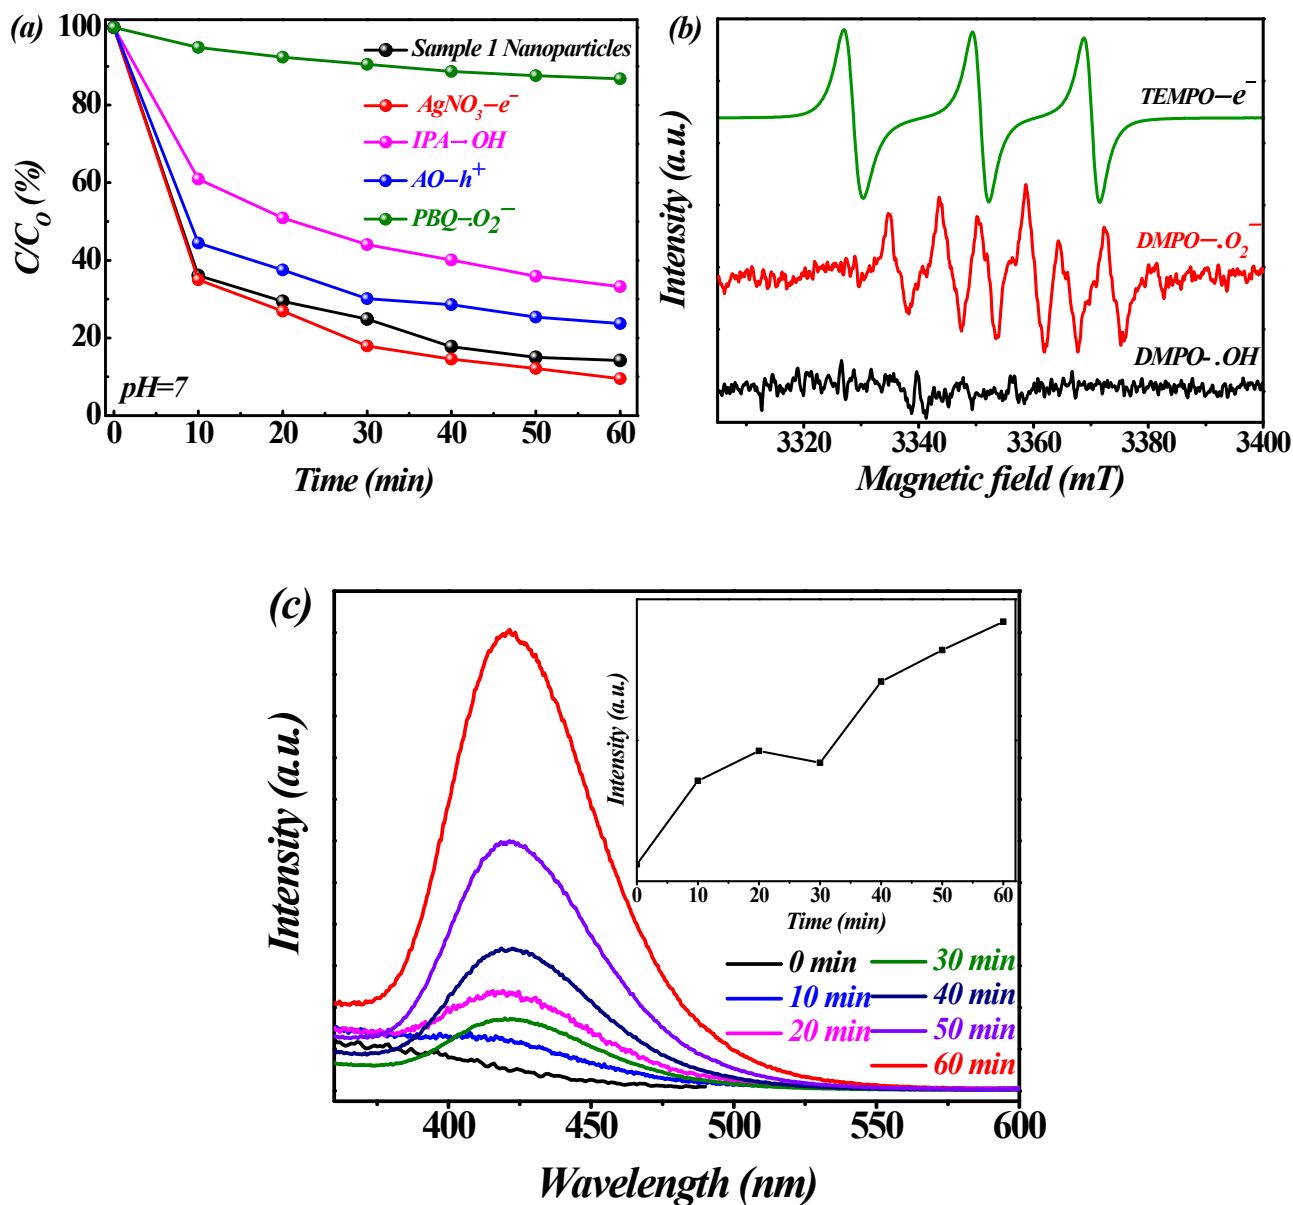

**Figure S8.** (a) Trapping studies of tetracycline degradation activity over *sample 1*; (b) ESR detection of superoxide, hydroxyl radicals using a DMPO spin-trapping agent. The methanol solution of DMPO was preirradiated in the presence of *sample 1*; ESR detection of electrons with TEMPO spin-trapping agent (0.02 mM TEMPO) over *sample 1*; (c) Hydroxyl radical  $\cdot OH$  detection photoluminescence (PL) spectra of *sample 1* in  $5.0 \times 10^{-4}$  M basic solution of terephthalic acid under visible-light irradiation. Inset: the plot of the induced PL intensity (at 425.0 nm) vs. irradiation time.

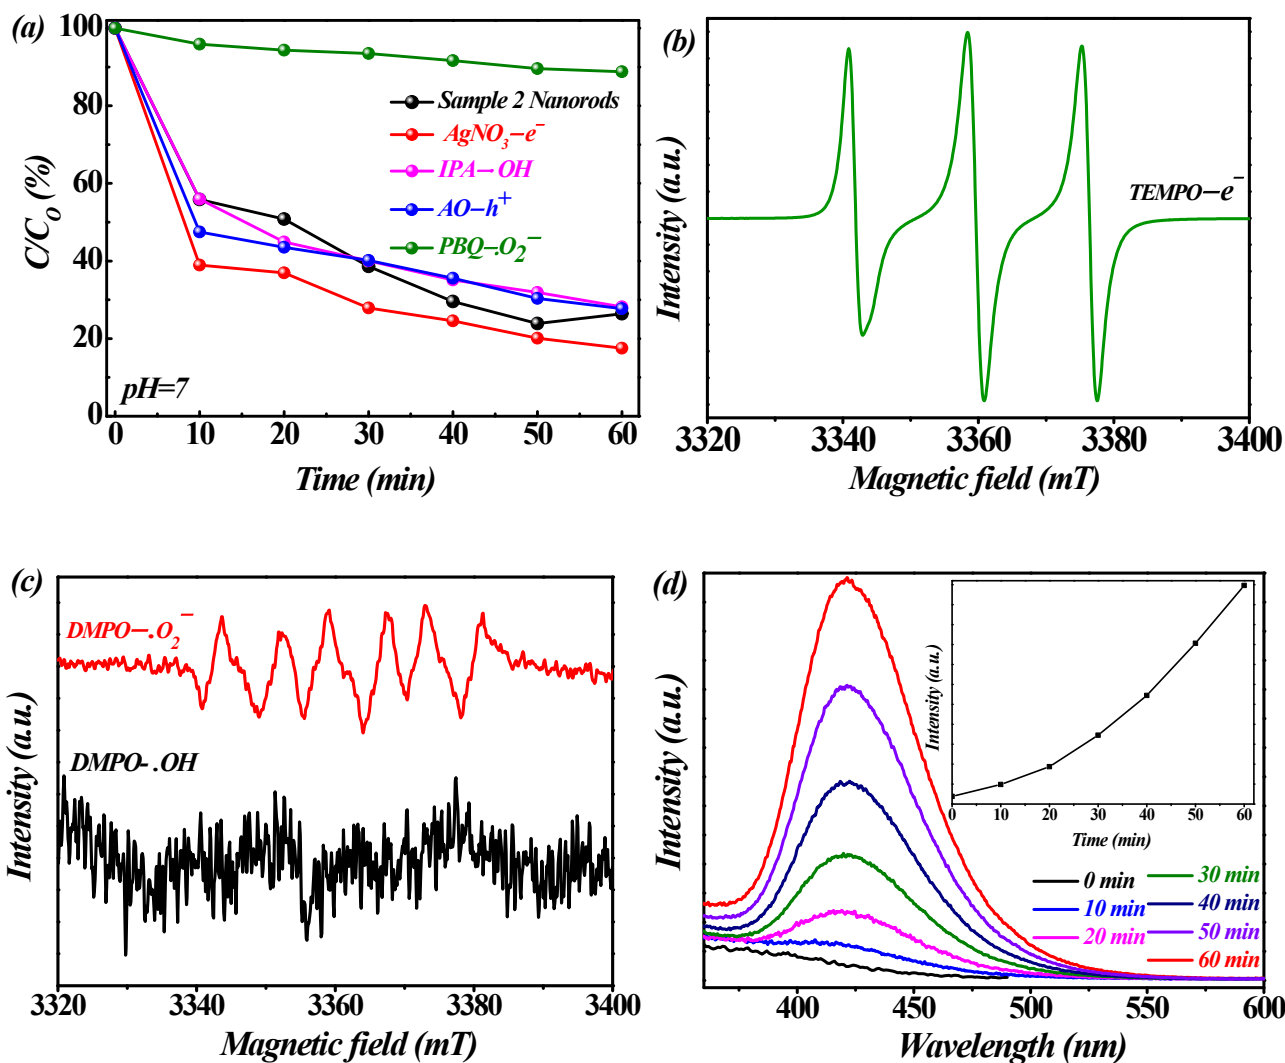

**Figure S9.** (a) Trapping studies of tetracycline degradation activity over *sample 2*; (b) ESR detection of electrons with TEMPO spin-trapping agent (0.02 mM TEMPO) over *sample 2*; (c) ESR detection of superoxide, hydroxyl radicals using a DMPO spin-trapping agent. The methanol solution of DMPO was preirradiated in the presence of *sample 2*; (d) Hydroxyl radical  $\cdot OH$  detection photoluminescence (PL) spectra of *sample 2* in  $5.0 \times 10^{-4}$  M basic solution of terephthalic acid under visible-light irradiation. Inset: the plot of the induced PL intensity (at 425.0 nm) vs. irradiation time.

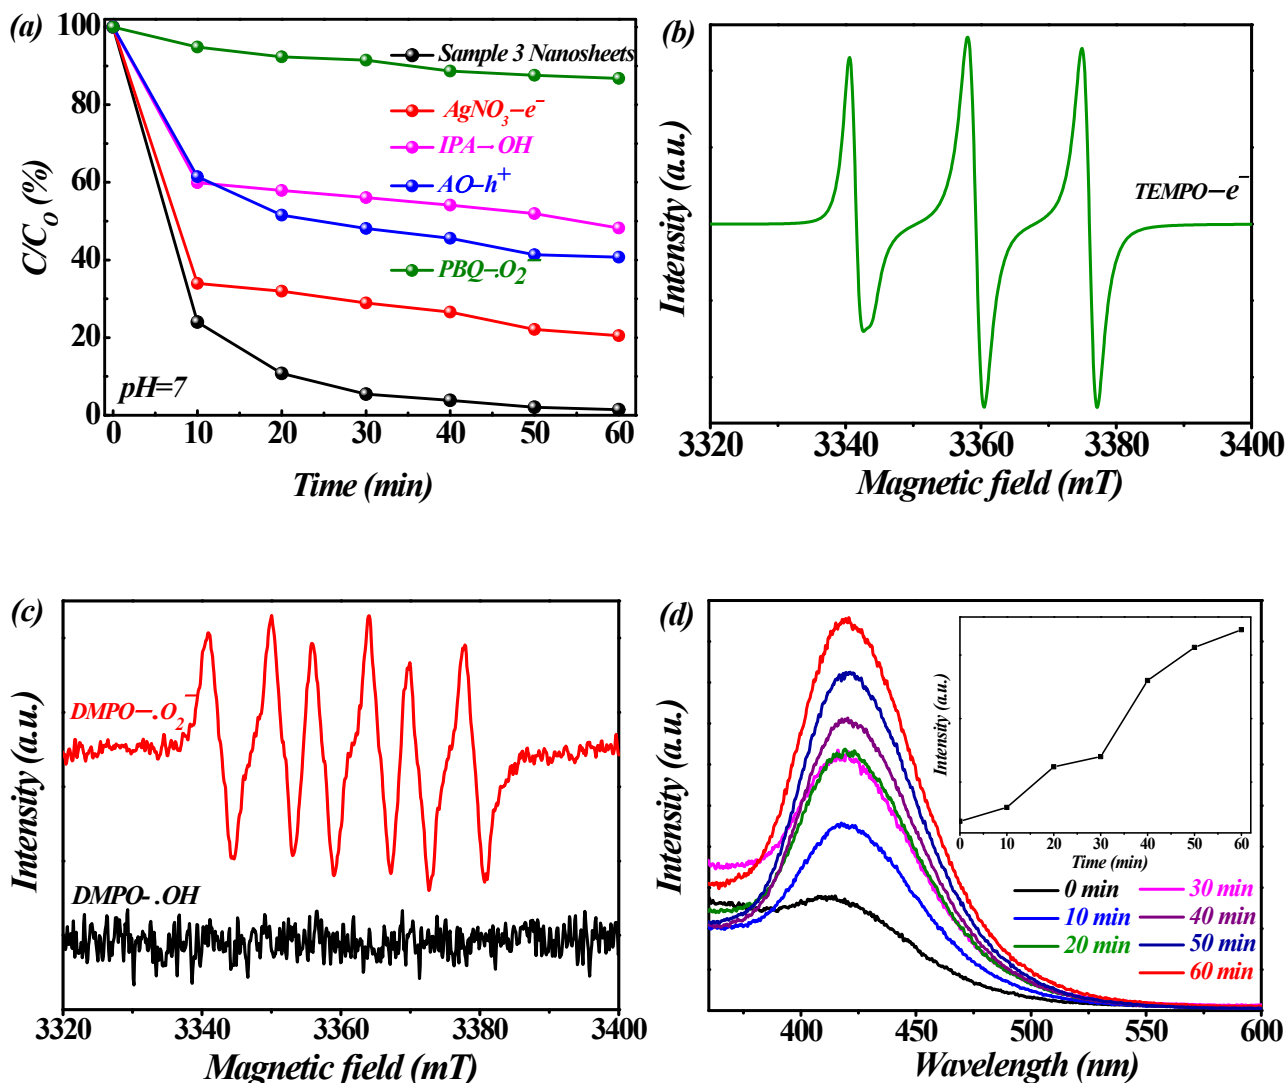

**Figure S10.** (a) Trapping studies of tetracycline degradation activity over *sample 3*; (b) ESR detection of electrons with TEMPO spin-trapping agent (0.02 mM TEMPO) over *sample 3*; (c) ESR detection of superoxide, hydroxyl radicals using a DMPO spin-trapping agent. The methanol solution of DMPO was preirradiated in the presence of *sample 3*; (d) Hydroxyl radical  $\cdot OH$  detection photoluminescence (PL) spectra of *sample 3* in  $5.0 \times 10^{-4}$  M basic solution of terephthalic acid under visible-light irradiation. Inset: the plot of the induced PL intensity (at 425.0 nm) vs. irradiation time.



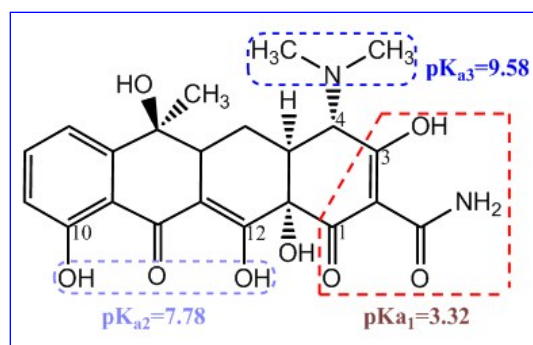

**Figure S11.** Structure and  $pK_a$  of tetracycline

## Initial pH Influence for Tetracycline Degradation

To examine the influence of initial pH value on the stability and decomposition efficiency of tetracycline, the photocatalytic experiments were conducted within the pH range of 1.0 ~ 9.0 as shown in Figure S12. It can be seen that tetracycline shows unstable at higher pH media, on which tetracycline displays relatively higher degradation at alkaline media with the absence of photocatalyst. An initial influence of pH on tetracycline degradation was examined in the presence of *sample 6*. Same decomposition trends were found with light irradiation over studied *sample 6*.

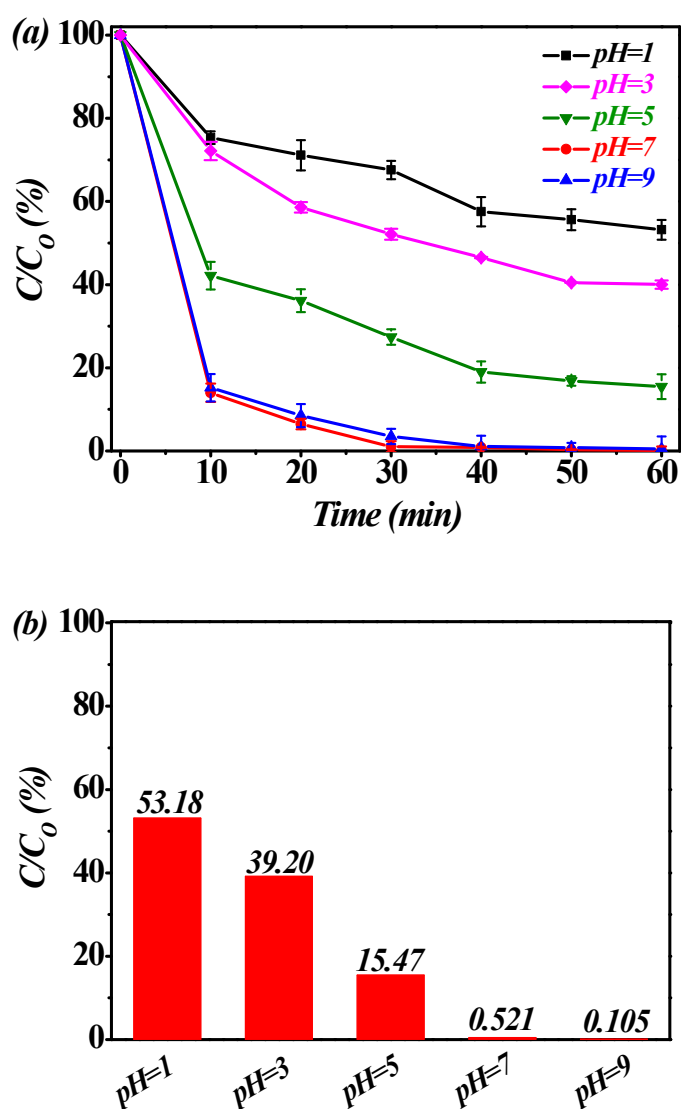

**Figure S12.** Initial pH influences to tetracycline degradation in the presence of *sample 6*.

## References

1. J. H. Jiang, W. Q. Fan, X. Zhang, H. Y. Bai, Y. Liu, S. Huang, B. D. Mao, S. L. Yuan, C. B. Liu, W. D. Shi, *New J. Chem.*, 2016, **40**, 538.
2. A. Ren, C. B. Liu, Y. Z. Hong, W. D. Shi, S. Lin, P. Li, *Chem. Eng. J.*, 2014, **258**, 301.
3. J. H. Jiang, K. L. Liu, W. Q. Fan, M. Li, Y. Liu, B. D. Mao, H. Y. Bai, H. Q. Shen, S. L. Yuan, W. D. Shi, *Mater. Lett.*, 2016, **176**, 1.
4. Z. Zhu, Z. Y. Lu, D. D. Wang, X. Tang, Y. S. Yan, W. D. Shi, Y. S. Wang, N. L. Gao, X. Yao, H. J. Dong, *Appl. Catal., B*, 2016, **182**, 115.
5. Z. Zhu, X. Tang, S. Kang, P. W. Huo, M. S. Song, W. D. Shi, Z. Y. Lu, Y. S. Yan, *J. Phys. Chem. C*, 2016, **120**, 27250.
6. L. Q. Jing, Y. G. Xu, S. Q. Huang, M. Xie, M. Q. He, H. Xua, H. M. Li, Q. Zhang, *Appl. Catal., B*, 2016, **199**, 11.
7. P. Li, C. B. Liu, G. L. Wu, Y. Heng, S. Lin, A. Ren, K. H. Lv, L. S. Xiao, W. D. Shi, *RSC Adv.*, 2014, **4**, 47615.
8. Y. Z. Hong, A. Ren, Y. H. Jiang, J. H. He, L. S. Xiao, W. D. Shi, *Ceram. Int.*, 2015, **41**, 1477.
9. C. B. Liu, G. L. Wu, J. B. Chen, K. Huang, W. D. Shi, *New J. Chem.*, 2016, **40**, 5198.
10. M. M. Liu, L.-A. Hou, B.-D. Xi, Q. Li, X. J. Hu, S. L. Yu, *Chem. Eng. J.*, 2016, **302**, 475.
